# Supplementary material for: Electrochemically shape-controlled synthesis of great stellated dodecahedral Au nanocrystals with high-index facets for nitrogen reduction to ammonia
Source: Royal Society of Chemistry journal article supplement (doi:10.1039/d0cc04326e), 2020-01-01
Supplement: d0cc04326e1.pdf [file d0cc04326e1.pdf]

Electronic supplementary information (ESI)

**Electrochemically shape-controlled synthesis of great stellated  
dodecahedral Au nanocrystals with high-index facets for  
nitrogen reduction to ammonia**

Yu-Chen Jiang,<sup>a</sup> Yu-Jie Mao,<sup>a</sup> Jin Zou,<sup>a</sup> Hong-Hui Wang,<sup>b</sup> Feng Liu,<sup>a</sup> Yong-Sheng  
Wei,<sup>a</sup> Tian Sheng,<sup>\*c</sup> Xin-Sheng Zhao,<sup>a</sup> Lu Wei<sup>\*a</sup>

<sup>a</sup> School of Physics and Electronic Engineering, Jiangsu Normal University, Xuzhou  
221116, E-mail: lwei057@jsnu.edu.cn

<sup>b</sup> School of Environmental Science & Engineering, Xiamen University Tan Kah Kee  
College, Zhangzhou 363105, China.

<sup>c</sup> College of Chemistry and Materials Science, Anhui Normal University, Wuhu,  
241000, China. E-mail: tsheng@ahnu.edu.cn

## 1. Chemical and materials

Hydrogen tetrachloroaurate trihydrate ( $\text{HAuCl}_4 \cdot 3\text{H}_2\text{O}$ , 99.9%), choline chloride ( $\text{HOC}_2\text{H}_4 \text{N}(\text{CH}_3)_3\text{Cl}$ , 99%), urea ( $\text{CO}(\text{NH}_2)_2$ , AR reagent, >99%), hydrochloric acid ( $\text{HCl}$ , AR reagent, 36.0~38.0%), perchloric acid ( $\text{HClO}_4$ , GR reagent), sulfuric acid ( $\text{H}_2\text{SO}_4$ , GR reagent, 95~98%), sodium hydroxide ( $\text{NaOH}$ , AR reagent), salicylic acid (AR reagent), sodium citrate (AR reagent), sodium hypochlorite aqueous solution ( $\text{NaClO}$ , AR reagent), sodium nitroferricyanide ( $\text{C}_5\text{FeN}_6\text{Na}_2\text{O}$ , AR reagent), para-(dimethylamino) benzaldehyde (AR reagent) and Au spheres (CAS: 7440-57-5, 0.5~0.8  $\mu\text{m}$ ) were purchased from Sinopharm Chemical Reagent Co. Ltd (Shanghai, China).

## 2. Preparation of deep eutectic solvent

The typical preparation of choline chloride-urea (ChCl-U) based deep eutectic solvent (DES) was described in detail in previous reports.<sup>S1-S3</sup> In short, purified ChCl and urea were mixed in a beaker at a defined ratio (ChCl: urea = 1: 2, molar ratio) and stirred at 80 °C until a uniform colorless liquid formed. The as-prepared DES was then stored in a vacuum of 80 °C before use.

## 3. Synthesis of great stellated dodecahedral Au nanocrystals

The GSD Au nanocrystals (NCs) were synthesized by electrodeposition in a standard three-electrode cell connected to a CHI 760E electrochemical workstation (Shanghai Chenhua Instrumental Co., Ltd., China), with a platinum wire counter

electrode and a platinum quasi-reference electrode. The working electrode was a glassy carbon disk (GC,  $\Phi = 6$  mm). Prior to each electrodeposition, the GC was polished using a fine mechanical  $\text{Al}_2\text{O}_3$  with powder size of 1.0 and 0.3  $\mu\text{m}$  and then cleaned ultrasonically in an ultrapure water bath. In a typical synthesis, the GSD Au NCs were synthesized by a double-step potential method in an ageing ChCl-urea based DES solution containing 24.28 mM  $\text{HAuCl}_4$  at 60  $^\circ\text{C}$ . The ageing time of  $\text{HAuCl}_4/\text{DES}$  solution is more than 5 months and the ageing temperature is 28  $^\circ\text{C}$ . In detail, the GC working electrode was first subjected at open circuit potential (OCP), soon afterwards step to nucleation potential ( $E_N$ ) of -0.97 V (vs. Pt) for 0.25 s, then step to growth potential ( $E_G$ ) of -0.50 V for 500 s, as shown in Scheme S1.

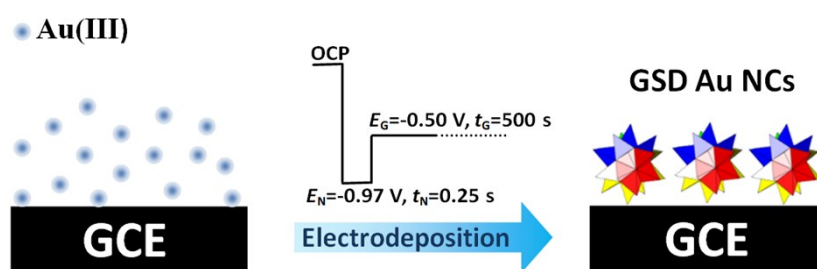

**Scheme S1.** Illustration of the electrodeposition procedure for preparation of GSD Au NCs.

#### 4. ICP-MS Analysis

The inductively coupled plasma mass spectrometry method (ICP-MS) was carried out to quantify the amount of Au on the as-prepared GSD Au NCs electrode, as listed in Table S1. The result shows that the Au loading on the as-prepared GSD Au NCs electrode is 9.18  $\mu\text{g}$ .

**Table S1.** ICP-MS results of Au on the as-prepared GSD Au NCs electrodes.

| Samples | Content / $\mu\text{g}$ | Average value / $\mu\text{g}$ |
|---------|-------------------------|-------------------------------|
| 1#      | 9.425                   | 9.18                          |
| 2#      | 9.325                   |                               |
| 3#      | 8.800                   |                               |

## 5. Preparation of working electrode using commercial Au spheres catalyst

To prepare the working electrode, 3.0 mg of the Au spheres (CAS: 7440-57-5, 0.5~0.8  $\mu\text{m}$ ) and 100  $\mu\text{L}$  Nafion alcohol solution (5 wt %) were dispersed into 3 mL ultrapure water under ultrasonic treatment for 10 min. Then 10  $\mu\text{L}$  of the treated Au spheres ink was transferred onto a glassy carbon (GC,  $\Phi = 6$  mm) electrode and dried in air, denoted as Au spheres/GC electrode. The Au loading on the as-prepared commercial Au spheres catalyst electrode is 10  $\mu\text{g}$ . Prior to preparation, the GC electrode was polished mechanically by using finer  $\text{Al}_2\text{O}_3$  powder with sizes of 1.0  $\mu\text{m}$  and then cleaned ultrasonically in an ultrapure water bath.

## 6. Structure characterization

Scanning electron microscopy (SEM) images of great stellated dodecahedral Au NCs were analyzed using SU8010 electron microscope. Transmission electron microscopy (TEM) measurements were carried out on a FEI Tecnai-F30 electron microscope with an operating voltage of 300 kV. HAADF imaging and mappings

were executed using a JEOL ARM200F (JEOL, Tokyo, Japan) STEM with an accelerating voltage of 200 kV with a thermal field-emission gun and a probe Cs corrector (CEOS GmbH, Heidelberg, Germany).

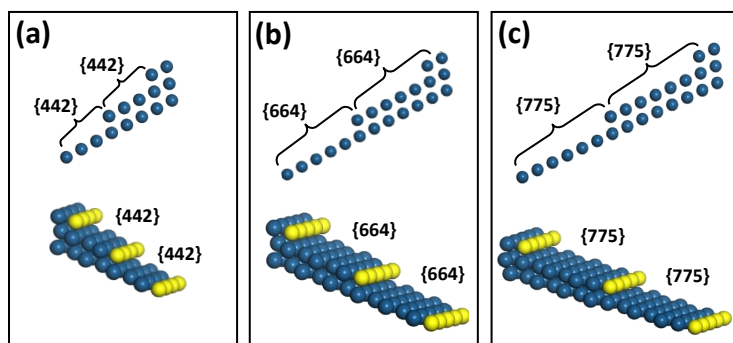

**Fig. S1** Atomic models of (a) Au{442}, (b) Au{664} and (c) Au{775} planes, respectively.

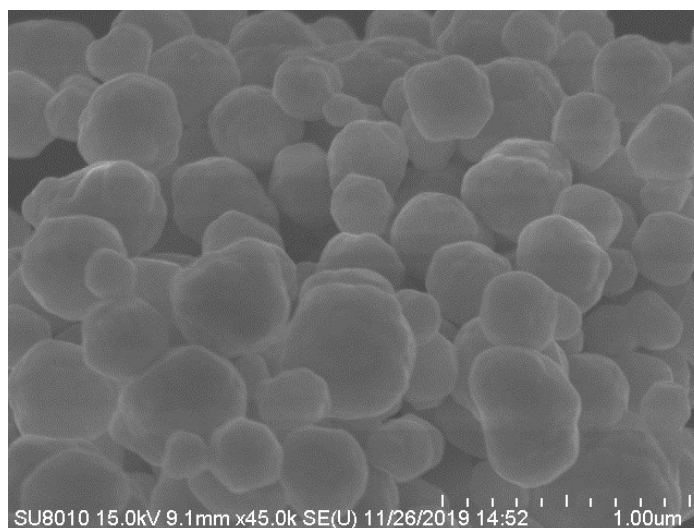

**Fig. S2** SEM image of Au spheres (CAS: 7440-57-5, 0.5~0.8  $\mu\text{m}$ ) purchased from Alfa Aesar Co. Ltd.

## 7. Electrochemical characterization

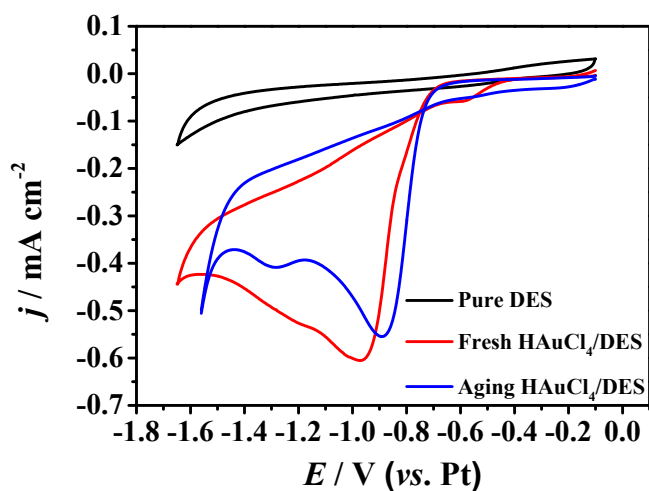

**Fig. S3** Cyclic voltammograms recorded on GC electrode in pure DES, fresh and aging  $\text{HAuCl}_4/\text{DES}$  solutions.

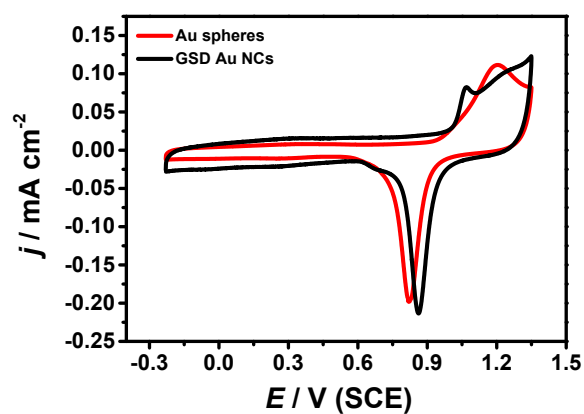

**Fig. S4** Cyclic voltammograms recorded on the GSD Au NCs and Au spheres in 0.1 M  $\text{HClO}_4$  solution. Scan rate:  $50 \text{ mV s}^{-1}$ ; temperature:  $25^\circ\text{C}$ .

The electrochemical characterization of the GSD Au NCs was carried out in 0.1 M  $\text{HClO}_4$  solution at room temperature ( $25^\circ\text{C}$ ). The solution was deaerated by

purging with pure N<sub>2</sub> gas before experiment, and a flux of N<sub>2</sub> was kept over the solution during measurements to prevent the interference of atmospheric oxygen. A saturated calomel electrode (SCE) was used as reference electrode.

## 8. Electrocatalytic nitrogen reduction measurements

The NRR activity tests were conducted in a standard three-electrode cell containing 30 mL of 1 mM HCl solution under ambient conditions, in which the cathode and anode was separated by the Nafion-211 membrane. Before NRR test, the Nafion 211 membrane was heated in 5 % H<sub>2</sub>O<sub>2</sub>, 0.5 M H<sub>2</sub>SO<sub>4</sub>, and ultrapure water at 80 °C for 1 h, respectively. A graphite flake electrode and a saturated calomel electrode (SCE) were used as the counter and reference electrodes, respectively. For electrochemical N<sub>2</sub> reduction, chronoamperometry tests were carried out at different potentials in N<sub>2</sub>-saturated 1 mM HCl solution, which was purged with N<sub>2</sub> for 1 hr before the measurement. The NRR products were spectrophotometrically determined by the indophenol indicator and the Watt and Chrisp methods.<sup>30,31</sup> The calibration curve for the NH<sub>3</sub> meter is shown in Fig. S5. The NH<sub>3</sub> yield rate ( $r$ ) and Faradaic efficiency (FE) are calculated by the following equations:

$$r(NH_3) = \frac{[NH_3] \times V}{t \times A} \quad (1)$$

$$FE(NH_3) = \frac{Q_{NH_3}}{Q_{total}} \frac{3 \times 96500 \times [NH_3] \times V}{\int idt} \quad (2)$$

Where  $A$  is the electrochemically active surface area, which was calculated using the charge associated with the reduction of a full monolayer of Au oxides (Fig. S4).

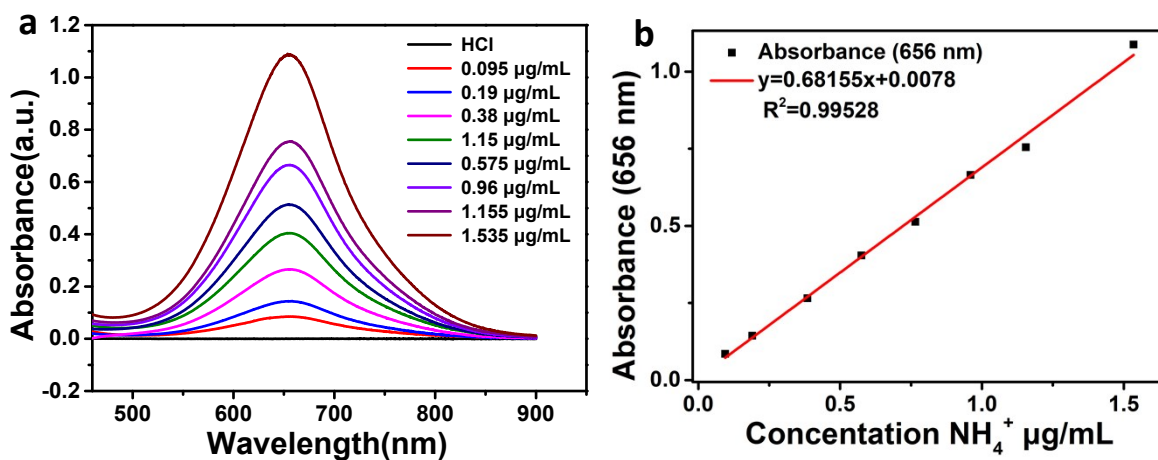

**Fig. S5** Absolute calibration of the indophenol blue method using ammonium chloride solutions of known concentration as standards. (a) UV-Vis curves of indophenol assays with  $\text{NH}_4^+$  ions after incubated for 1 hour at room temperature; (b) calibration curve used for estimation of  $\text{NH}_3$  by  $\text{NH}_4^+$  ion concentration. The absorbance at 656 nm was measured by UV-Vis spectrophotometer, and the fitting curve shows good linear relation of absorbance with  $\text{NH}_4^+$  ion concentration ( $y = 0.6815x + 0.0078$ ,  $R^2 = 0.99528$ ) of three times independent calibration curves.

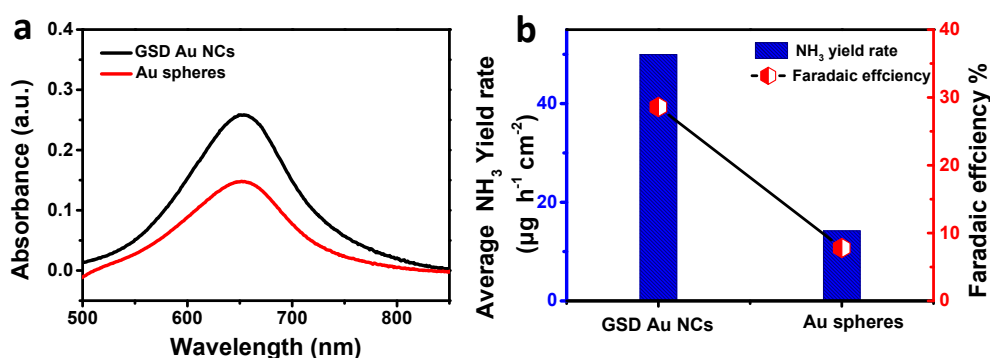

**Fig. S6** (a) UV-vis absorption spectra of the electrolytes stained with an indophenol blue indicator after NRR electrolysis at -0.4 V on the GSD Au NCs and Au spheres. (b) Yield rate of  $\text{NH}_3$  and Faradaic efficiency at -0.4 V on the GSD Au NCs and Au spheres.



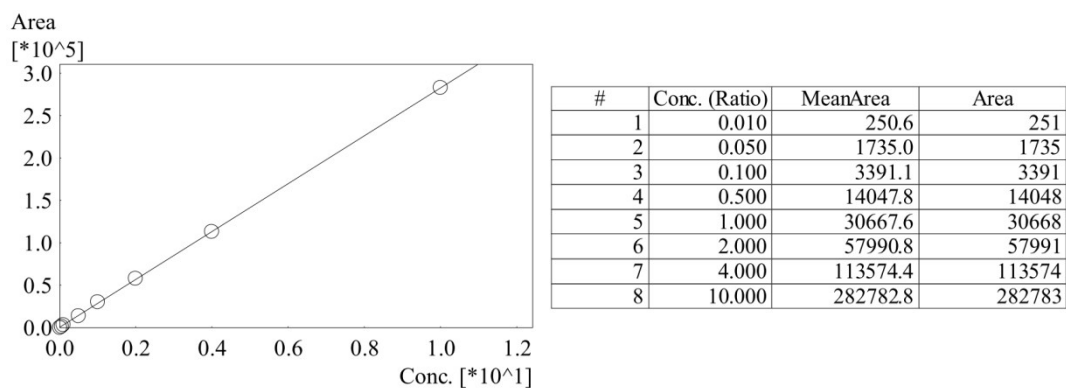

**Fig. S7** calibration curve used for estimation of  $\text{NH}_4^+$  ion concentration by ion chromatography method.

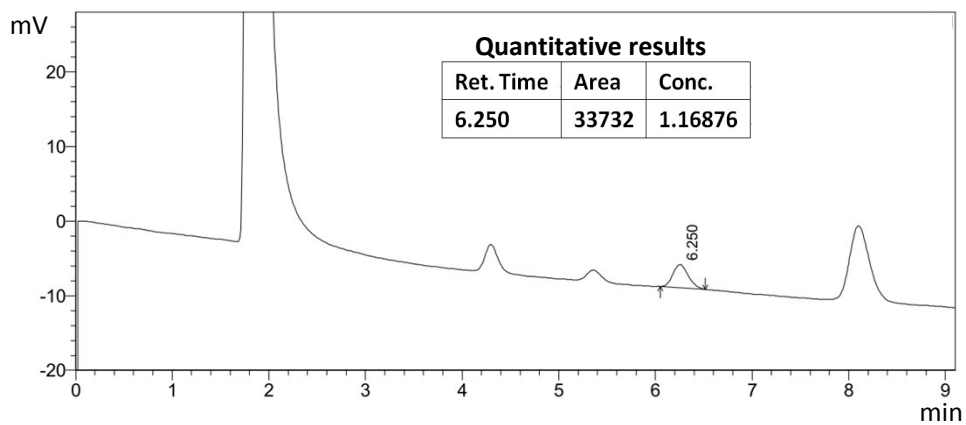

**Fig. S8** Ion chromatography of the electrolytes after NRR electrolysis on the GSD Au NCs at -0.4 V (vs. RHE) for 2 h.

## 9. Durability tests

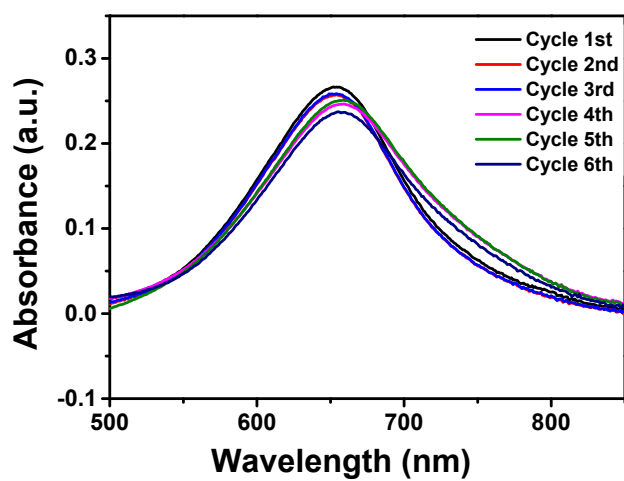

**Fig. S9** UV-Vis absorption spectra of the electrolytes stained with indophenol blue indicator after NRR electrolysis on the GSD Au NCs in 1 mM HCl solution for different cycling tests.

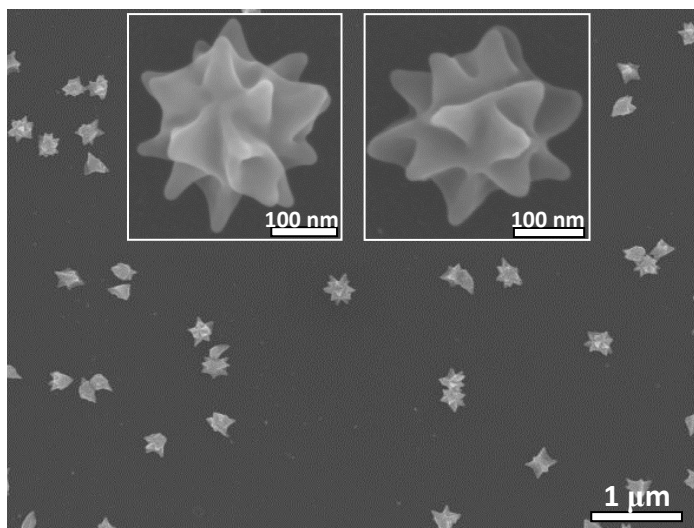

**Fig. S10** SEM image of the GSD Au NCs obtained after NRR endurance cycle test, confirming that the Au NCs still kept the GSD shape after the reaction. The insets show the high-magnification SEM images.

## 10. Determination of $\text{N}_2\text{H}_4$

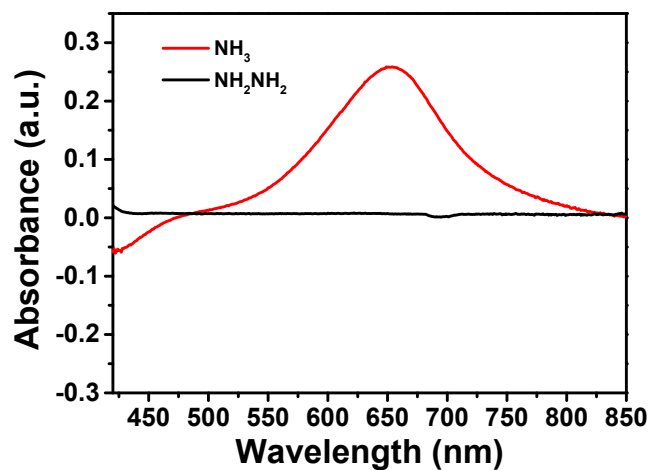

**Fig. S11** UV-vis absorption spectra of the electrolytes stained with indophenol blue indicator (red line) and Watt-Christ (black line) methods after NRR electrolysis on GSD Au NCs at -0.4 V for 2 h.

## 11. Isotope labelling experiments

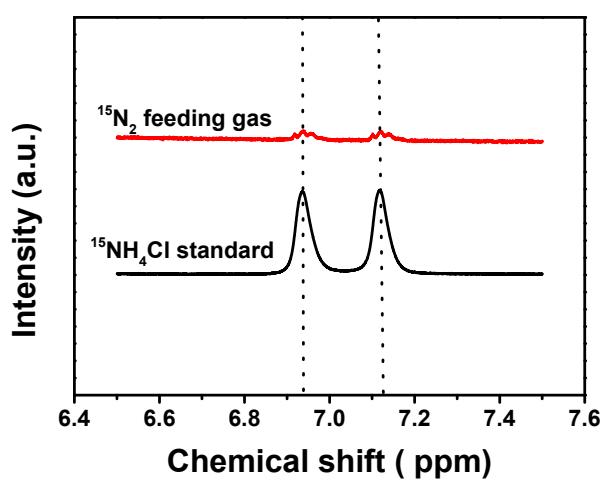

**Fig. S12**  $^1\text{H}$  NMR spectra of the electrolyte after the NRR test at -0.4 V using  $^{15}\text{N}_2$  as the feed gas in 1 mM HCl and  $^{15}\text{NH}_4\text{Cl}$  standard.

## 12. Summary of the representative reports on NRR electrocatalysts

**Table S2** Summary of the representative reports on NRR electrocatalysts under ambient conditions.

| Electrocatalysts                         | Electrolytes                             | $r_{\text{NH}_3}$                                              | FE (%)       | Overpotential(V/RHE) | Ref.             |
|------------------------------------------|------------------------------------------|----------------------------------------------------------------|--------------|----------------------|------------------|
| <b>GSD Au NCs</b>                        | <b>1 mM HCl</b>                          | <b>49.96 <math>\mu\text{g h}^{-1} \text{cm}^{-2}</math></b>    | <b>28.59</b> | <b>-0.4</b>          | <b>This work</b> |
| a-Au/CeO <sub>x</sub> -RGO               | 0.1 M HCl                                | 8.3 $\mu\text{g h}^{-1} \text{mg}^{-1}_{\text{cat}}$           | 10.10        | -0.2                 | 5                |
| Au THH NR                                | 0.1 M KOH                                | 1.648 $\mu\text{g h}^{-1} \text{cm}^{-2}$                      | 4.0          | -0.2                 | 23               |
| pAu/NF                                   | 0.1 M Na <sub>2</sub> SO <sub>4</sub>    | 9.42 $\mu\text{g h}^{-1} \text{cm}^{-2}$                       | 13.36        | -0.2                 | S4               |
| Au SAs-NDPCs                             | 0.1 M HCl                                | 2.32 $\mu\text{g h}^{-1} \text{cm}^{-2}$                       | 12.3         | -0.2                 | S5               |
| Au NPs                                   | 0.1 M Li <sub>2</sub> SO <sub>4</sub>    | 9.22 $\mu\text{g h}^{-1} \text{cm}^{-2}$                       | 73.32        | -0.3                 | 6                |
| Au/Ti <sub>3</sub> C <sub>2</sub>        | 0.1 M HCl                                | 30.06 $\mu\text{g h}^{-1} \text{mg}^{-1}_{\text{cat}}$         | 18.34        | -0.2                 | S6               |
| BD-Ag/AF                                 | 0.1 M Na <sub>2</sub> SO <sub>4</sub>    | 2.07 $\times 10^{-11}$ mol s <sup>-1</sup><br>cm <sup>-2</sup> | 7.36         | -0.6                 | S7               |
| Ag nanosheet                             | 0.1 M HCl                                | 4.62 $\times 10^{-11}$ mol s <sup>-1</sup><br>cm <sup>-2</sup> | 4.8          | -0.6                 | 7                |
| Ag TPs                                   | 0.1-0.6 M K <sub>2</sub> SO <sub>4</sub> | 58.5 mg h <sup>-1</sup> g <sub>Ag</sub> <sup>-1</sup>          | 25           | -0.25                | S8               |
| Pd-TA                                    | 0.1 M Na <sub>2</sub> SO <sub>4</sub>    | 24.12 $\mu\text{g h}^{-1} \text{mg}^{-1}_{\text{cat}}$         | 9.49         | -0.45                | 8                |
| Ru SAs/g-C <sub>3</sub> N <sub>4</sub>   | 0.5 M NaOH                               | 23.0 $\mu\text{g h}^{-1} \text{mg}^{-1}_{\text{cat}}$          | 8.3          | 0.05                 | 9                |
| Ru@ZrO <sub>2</sub> /NC                  | 0.1 M HCl                                | 3.665 mg h <sup>-1</sup> mg <sup>-1</sup> <sub>cat</sub>       | 15           | -0.21                | 10               |
| Ru NPs                                   | 0.01 M HCl                               | 5.5 mg h <sup>-1</sup> m <sup>-2</sup>                         | 5.4          | -0.1                 | S9               |
| Dendritic Cu                             | 0.1 M HCl                                | 25.63 $\mu\text{g h}^{-1} \text{mg}^{-1}_{\text{cat}}$         | 15.12        | -0.4                 | S10              |
| Cu NPs-rGO                               | 0.5 M LiClO <sub>4</sub>                 | 24.58 $\mu\text{g h}^{-1} \text{mg}^{-1}_{\text{cat}}$         | 15.32        | -0.4                 | S11              |
| Ag-Au nanocages                          | 0.5 M LiClO <sub>4</sub>                 | 3.74 $\mu\text{g h}^{-1} \text{cm}^{-2}$                       | 35.9         | -0.4                 | S12              |
| Au <sub>1</sub> Cu <sub>1</sub>          | 0.05 M H <sub>2</sub> SO <sub>4</sub>    | 154.91 $\mu\text{g h}^{-1} \text{mg}^{-1}_{\text{cat}}$        | 54.96        | -0.2                 | S13              |
| AuPdP NWs                                | 0.1 M Na <sub>2</sub> SO <sub>4</sub>    | 7.51 $\mu\text{g h}^{-1} \text{cm}^{-2}$                       | 15.44        | -0.3                 | S14              |
| PdAg                                     | 1 M KOH                                  | 24.1 $\mu\text{g h}^{-1} \text{mg}^{-1}$                       | 1.7          | -0.2                 | S15              |
| Pd <sub>3</sub> Cu <sub>1</sub>          | 1 M KOH                                  | 39.9 $\mu\text{g h}^{-1} \text{mg}^{-1}_{\text{cat}}$          | 1.22         | -0.25                | S16              |
| Pd-Co/CuO                                | 0.1 M KOH                                | 10.04 $\mu\text{g h}^{-1} \text{mg}^{-1}_{\text{cat}}$         | 2.16         | -0.2                 | S17              |
| PdRu TPs                                 | 0.1 M KOH                                | 37.23 $\mu\text{g h}^{-1} \text{mg}^{-1}_{\text{cat}}$         | 1.85         | -0.2                 | S18              |
| RhCu-BUNNs                               | 0.1 M KOH                                | 95.06 $\mu\text{g h}^{-1} \text{mg}^{-1}_{\text{cat}}$         | 1.5          | -0.2                 | S19              |
| TiO <sub>2</sub> nanosheets              | 0.1 M H <sub>2</sub> SO <sub>4</sub>     | 35.6 $\mu\text{g h}^{-1} \text{mg}^{-1}_{\text{cat}}$          | 5.3          | -0.8                 | S20              |
| d-TiO <sub>2</sub> /TM                   | 0.1 M HCl                                | 1.24 $\times 10^{-10}$ mol s <sup>-1</sup><br>cm <sup>-2</sup> | 9.17         | -0.15                | S21              |
| VO <sub>2</sub>                          | 0.1 M Na <sub>2</sub> SO <sub>4</sub>    | 14.85 $\mu\text{g h}^{-1} \text{mg}^{-1}_{\text{cat}}$         | 3.97         | -0.7                 | S22              |
| Cr <sub>2</sub> O <sub>3</sub> -rGO      | 0.1 M HCl                                | 33.3 $\mu\text{g h}^{-1} \text{mg}^{-1}_{\text{cat}}$          | 7.33         | -0.7                 | S23              |
| Cr <sub>2</sub> O <sub>3</sub> nanofiber | 0.1 M HCl                                | 28.13 $\mu\text{g h}^{-1} \text{mg}^{-1}_{\text{cat}}$         | 8.56         | -0.75                | 11               |
| MnO-CNF                                  | 0.1 M Na <sub>2</sub> SO <sub>4</sub>    | 35.9 $\mu\text{g h}^{-1} \text{mg}^{-1}_{\text{cat}}$          | 1.52         | -1.25                | S24              |
| Mn <sub>3</sub> O <sub>4</sub> @rGO      | 0.1 M Na <sub>2</sub> SO <sub>4</sub>    | 17.4 $\mu\text{g h}^{-1} \text{mg}^{-1}_{\text{cat}}$          | 3.52         | -0.85                | S25              |
| Mn <sub>3</sub> O <sub>4</sub> nanocube  | 0.1 M Na <sub>2</sub> SO <sub>4</sub>    | 11.6 $\mu\text{g h}^{-1} \text{mg}^{-1}_{\text{cat}}$          | 3.0          | -0.8                 | S26              |
| a-Fe <sub>2</sub> O <sub>3</sub>         | 0.1 M KOH                                | 32.13 $\mu\text{g h}^{-1} \text{mg}^{-1}_{\text{cat}}$         | 6.63         | -0.3                 | 12               |
| p-Fe <sub>2</sub> O <sub>3</sub> /CC     | 0.1 M Na <sub>2</sub> SO <sub>4</sub>    | 6.78 $\mu\text{g h}^{-1} \text{cm}^{-2}$                       | 7.69         | -0.4                 | S27              |

**Table S2 (continued)**

|                                         |                                        |                                                                |      |       |     |
|-----------------------------------------|----------------------------------------|----------------------------------------------------------------|------|-------|-----|
| Fe <sub>2</sub> O <sub>3</sub> nanorods | 0.1 M Na <sub>2</sub> SO <sub>4</sub>  | 15.9 μg h <sup>-1</sup> mg <sup>-1</sup> <sub>cat</sub>        | 0.94 | -0.8  | S28 |
| Fe <sub>3</sub> O <sub>4</sub> nanorod  | 0.1 M Na <sub>2</sub> SO <sub>4</sub>  | 5.6×10 <sup>-11</sup> mol s <sup>-1</sup><br>cm <sup>-2</sup>  | 2.6  | -0.4  | S28 |
| CoO QD/RGO                              | 0.1 M Na <sub>2</sub> SO <sub>4</sub>  | 21.5 μg h <sup>-1</sup> mg <sup>-1</sup>                       | 8.3  | -0.6  | S30 |
| NiO/CC                                  | 0.1 M LiClO <sub>4</sub>               | 22.7 μg h <sup>-1</sup> mg <sup>-1</sup>                       | 7.3  | -0.5  | S31 |
| NiO/G                                   | 0.1 M Na <sub>2</sub> SO <sub>4</sub>  | 18.6 μg h <sup>-1</sup> mg <sup>-1</sup>                       | 7.8  | -0.7  | S32 |
| CuO/RGO                                 | 0.1 M Na <sub>2</sub> SO <sub>4</sub>  | 1.8×10 <sup>-10</sup> mol s <sup>-1</sup><br>cm <sup>-2</sup>  | 3.9  | -0.75 | S33 |
| ZnO/RGO                                 | 0.1 M Na <sub>2</sub> SO <sub>4</sub>  | 17.7 μg h <sup>-1</sup> mg <sup>-1</sup>                       | 6.4  | -0.65 | S34 |
| Y <sub>2</sub> O <sub>3</sub> nanosheet | 0.1 M Na <sub>2</sub> SO <sub>4</sub>  | 1.06×10 <sup>-10</sup> mol s <sup>-1</sup><br>cm <sup>-2</sup> | 2.53 | -0.9  | S35 |
| NbO <sub>2</sub> NPs                    | 0.05 M H <sub>2</sub> SO <sub>4</sub>  | 11.6 μg h <sup>-1</sup> mg <sup>-1</sup> <sub>cat</sub>        | 32   | -0.65 | S36 |
| SnO <sub>2</sub> /CC                    | 0.1 M Na <sub>2</sub> SO <sub>4</sub>  | 1.47×10 <sup>-10</sup> mol s <sup>-1</sup><br>cm <sup>-2</sup> | 2.17 | -0.8  | 13  |
| SnO <sub>2</sub> /RGO                   | 0.1 M Na <sub>2</sub> SO <sub>4</sub>  | 5.1 μg h <sup>-1</sup> cm <sup>-2</sup>                        | 7.1  | -0.5  | S37 |
| WO <sub>3</sub>                         | 0.5 M H <sub>2</sub> SO <sub>4</sub>   | 4.2 μg h <sup>-1</sup> mg <sup>-1</sup> <sub>cat</sub>         | 6.8  | -0.12 | 14  |
| CeO <sub>2</sub> nanorod                | 0.1 M Na <sub>2</sub> SO <sub>4</sub>  | 16.4 μg h <sup>-1</sup> mg <sup>-1</sup> <sub>cat</sub>        | 3.7  | -0.5  | S38 |
| β-FeOOH nanorods                        | 0.5 M LiClO <sub>4</sub>               | 23.32 μg h <sup>-1</sup> mg <sup>-1</sup> <sub>cat</sub>       | 6.7  | -0.7  | S39 |
| MoS <sub>2</sub> -rGO                   | 0.1 M LiClO <sub>4</sub>               | 24.82 μg h <sup>-1</sup> mg <sup>-1</sup> <sub>cat</sub>       | 4.58 | -0.45 | S40 |
| DR MoS <sub>2</sub> nanoflower          | 0.1 M Na <sub>2</sub> SO <sub>4</sub>  | 29.28 μg h <sup>-1</sup> mg <sup>-1</sup> <sub>cat</sub>       | 8.3  | -0.4  | 15  |
| MoS <sub>2</sub>                        | 0.1 M Na <sub>2</sub> SO <sub>4</sub>  | 8.08×10 <sup>-11</sup> mol s <sup>-1</sup><br>cm <sup>-2</sup> | 1.17 | -0.5  | 16  |
| Sn/SnS <sub>2</sub>                     | 0.1 M NaOH                             | 23.8 μg h <sup>-1</sup> mg <sup>-1</sup>                       | 6.5  | -0.8  | S41 |
| Fe <sub>3</sub> S <sub>4</sub>          | 0.1 M HCl                              | 75.4 μg h <sup>-1</sup> mg <sup>-1</sup> <sub>cat</sub>        | 6.45 | -0.4  | S42 |
| CoS <sub>2</sub>                        | 0.1 M HCl                              | 17.45 μg h <sup>-1</sup> mg <sup>-1</sup> <sub>cat</sub>       | 4.6  | -0.15 | S43 |
| VN/CC                                   | 0.1 M HCl                              | 2.48×10 <sup>-10</sup> mol s <sup>-1</sup><br>cm <sup>-2</sup> | 3.58 | -0.3  | 17  |
| Fe <sub>1</sub> -N-C                    | 1 M NaClO                              | 1.56×10 <sup>-11</sup> mol s <sup>-1</sup><br>cm <sup>-2</sup> | 4.51 | -0.05 | S44 |
| Fe-N/C                                  | 0.1 M KOH                              | 34.83 μg h <sup>-1</sup> mg <sup>-1</sup> <sub>cat</sub>       | 9.28 | -0.2  | 18  |
| CSA/NPC                                 | 0.05 M Na <sub>2</sub> SO <sub>4</sub> | 0.86 μmol h <sup>-1</sup> cm <sup>-2</sup>                     | 10.5 | -0.2  | S45 |
| B Nanosheet                             | 0.1 M Na <sub>2</sub> SO <sub>4</sub>  | 13.22 μg h <sup>-1</sup> mg <sup>-1</sup> <sub>cat</sub>       | 4.04 | -0.80 | 19  |
| B nanosheets                            | 0.1 M HCl                              | 3.12 μg h <sup>-1</sup> mg <sup>-1</sup> <sub>cat</sub>        | 4.84 | -0.14 | S46 |
| Defect Graphene                         | 0.01 M H <sub>2</sub> SO <sub>4</sub>  | 4.31 μg h <sup>-1</sup> mg <sup>-1</sup> <sub>cat</sub>        | 8.51 | -0.4  | 20  |
| rGO                                     | 0.5 M LiClO <sub>4</sub>               | 17.02 μg h <sup>-1</sup> mg <sup>-1</sup> <sub>cat</sub>       | 4.83 | -0.75 | S47 |

### 13. Computational methods

All electronic structure calculations were performed using the SIESTA package with Troullier-Martins norm conserving pseudopotentials.<sup>S48-S50</sup> The exchange-correlation functional utilized was at the generalized gradient approximation (GGA) level with Perdew-Burke-Ernzerhof (PBE).<sup>S51</sup> A double- $\xi$  plus polarization (DZP) basis set was employed and the orbital-confirming cutoff was determined from an energy shift of 0.01 eV. The Au(111), Au(110) and Au(310) slabs were modeled by a  $p(3\times 3)$ ,  $p(2\times 3)$ , and  $p(3\times 3)$  super cell with 36, 24 and 36 Pt atoms respectively, are shown in Fig. S9. The Monkhorst-Pack  $k$ -point mesh for describing the Brillouin zones was  $4\times 4\times 1$  for Au(111),  $6\times 4\times 1$  for Au(110) and  $4\times 4\times 1$  for Au(310). The bottom half Au atoms were fixed at their bulk positions and other atoms with intermediates were allowed to move during optimizations. The cut-off energy for the real space grid was 250 Ry. The vacuum region was  $\sim 15$  Å to eliminate interactions between slabs in the  $z$  direction.

The Gibbs free energy of species was obtained from  $G = E + ZPE - TS$ , where  $E$  is the total energy of species,  $S$  is the entropy and ZPE is the zero point energy at 300 K. The reaction free energy of  $A + H^+ + e^- \rightarrow AH$  was calculated as  $\Delta G = E(AH) - E(H^+ + e^-) - E(AH) + \Delta ZPE - T\Delta S$ . At the electrode potential of 0 V, pH = 0 ( $[H^+] = 1M$ ), at 298 K, due to the equilibrium of  $H^+ + e^- \rightarrow \frac{1}{2} H_2$ , we can use the free energy of  $\frac{1}{2} H_2$  in the gas phase to replace that of  $H^+ + e^-$ .<sup>S52</sup> All vibrational frequencies of adsorbates,  $\nu_i(\text{Hz})$ , were calculated based on the harmonic oscillators approximation.<sup>S53</sup> The adsorption energy was defined as:  $E_{\text{ad}} = E(\text{ad/surf}) - E(\text{ad}) -$

$E(\text{surf})$ , where  $E(\text{ad}/\text{surf})$ ,  $E(\text{ad})$ , and  $E(\text{surf})$  are the total energies of the adsorbate binding to surface, free adsorbate in vacuum and clean surface, respectively.

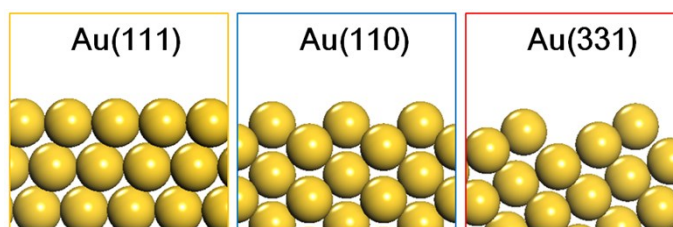

**Fig. S13** Side views of theoretical models of Au(111), Au(110) and Au(331).

**Table S3** Calculated reaction Gibbs free energies (unit in eV) of elementary steps for nitrogen reduction reactions including proton-electron transfer and N-N bond direct breaking steps under the electrode potential of -0.4 V (vs RHE) on Au(111), Au(110) and Au(331) respectively.

| elementary steps                                                                           | Au(111) | Au(110) | Au(331) |
|--------------------------------------------------------------------------------------------|---------|---------|---------|
| <i>proton-electron transfer processes</i>                                                  |         |         |         |
| $\text{N}_2 + \text{H}^+ + \text{e}^- \rightarrow \text{N}_2\text{H}^*$                    | 1.91    | 1.37    | 1.52    |
| $\text{N}_2\text{H}^* + \text{H}^+ + \text{e}^- \rightarrow \text{N}_2\text{H}_2^*$        | -0.92   | -0.57   | -0.68   |
| $\text{N}_2\text{H}_2^* + \text{H}^+ + \text{e}^- \rightarrow \text{N}_2\text{H}_3^*$      | -0.56   | -0.85   | -0.80   |
| $\text{N}_2\text{H}_3^* + \text{H}^+ + \text{e}^- \rightarrow \text{N}_2\text{H}_4^*$      | -1.14   | -1.02   | -1.13   |
| $\text{N}_2\text{H}_3^* + \text{H}^+ + \text{e}^- \rightarrow \text{NH}^* + \text{NH}_3$   | -0.76   | -0.24   | -0.75   |
| $\text{N}_2\text{H}_4^* + \text{H}^+ + \text{e}^- \rightarrow \text{NH}_2^* + \text{NH}_3$ | -1.07   | -1.17   | -1.07   |
| $\text{NH}_2^* + \text{H}^+ + \text{e}^- \rightarrow \text{NH}_3$                          | -1.28   | -0.82   | -0.90   |
| <i>N-N bond direct breaking processes</i>                                                  |         |         |         |
| $\text{N}_2 \rightarrow 2\text{N}^*$                                                       | 5.73    | 5.37    | 4.85    |
| $\text{N}_2\text{H}^* \rightarrow \text{N}^* + \text{NH}^*$                                | 2.53    | 2.94    | 2.11    |
| $\text{N}_2\text{H}_2^* \rightarrow 2\text{NH}^*$                                          | 1.42    | 2.38    | 1.50    |
| $\text{N}_2\text{H}_3^* \rightarrow \text{NH}^* + \text{NH}_2^*$                           | 0.53    | 0.59    | 0.15    |
| $\text{N}_2\text{H}_4^* \rightarrow 2\text{NH}_2^*$                                        | 0.21    | -0.34   | -0.18   |

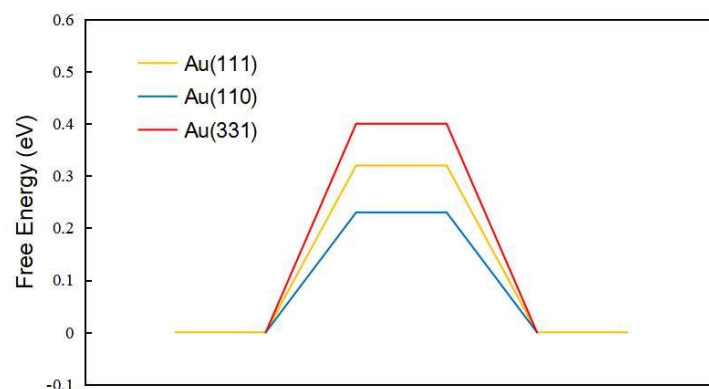

**Fig. S14** Gibbs free energy profiles for hydrogen evolution reactions on Au(111), Au(110) and Au(331) under standard electrode potential.

## References

- S1 L. Wei, Y.-J. Fan, H.-H. Wang, , N. Tian Z.-Y. Zhou, and S.-G. Sun, *Electrochim. Acta*, 2012, **76**, 468.
- S2 L. Wei, Y.-J. Fan, N. Tian, Z.-Y. Zhou, X.-Q. Zhao, B.-W. Mao, and Shi-Gang Sun, *J. Phys. Chem. C*, 2012, **116**, 2040.
- S3 L. Wei, Z.-Y. Zhou, S.-P. Chen, C.-D. Xu, D. Su, M. E. Schuster, and S.-G. Sun, *Chem. Commun.*, 2013, **49**, 11152.
- S4 H. Wang, H. Yu, Z. Wang, Y. Li, Y. Xu, X. Li, H. Xue, and L. Wang, *Small*, 2019, **15**, 1804769.
- S5 Q. Qin, T. Heil, M. Antonietti, and M. Oschatz, *Small Methods*, 2018, **2**, 1800202.
- S6 D. Liu, G. Zhang, Q. Ji, Y. Zhang and J. Li, *ACS Appl. Mater. Interfaces*, 2019, **11**, 25758.



- S7 L. Ji, X. Shi, A. M. Asiri, B. Zheng, and X. Sun, *Inorg. Chem.*, 2018, **57**, 14692.
- S8 W.-Y. Gao, Y.-C. Hao, X. Su, L.-W. Chen, T.-A. Bu, N. Zhang, Z.-L. Yu, Z. Zhu, and A.-X. Yin, *Chem. Commun.*, 2019, **55**, 10705.
- S9 D. Wang, L. M. Azofra, M. Harb, L. Cavallo, X. Zhang, B. H. R. Suryanto, and D. R. MacFarlane, *ChemSusChem*, 2018, **11**, 3416.
- S10 C. Li, S. Mou, X. Zhu, F. Wang, Y. Wang, Y. Qiao, X. Shi, Y. Luo, B. Zheng, Q. Li, and X. Sun, *Chem. Commun.*, 2019, **55**, 14474.
- S11 X. Guo, W. Yi, F. Qu, and L. Lu, *J. Power Sources*, 2020, **448**, 227417.
- S12 M. Nazemi, and M. A. El-Sayed, *J. Phys. Chem. C*, 2019, **123**, 11422-11427.
- S13 Y. Liu, L. Huang, X. Zhu, Y. Fang, and S. Dong, *Nanoscale*, 2020, **12**, 1811.
- S14 H. Wang, D. Yang, S. Liu, S. Yin, Y. Xu, X. Li, Z. Wang, and L. Wang, *ACS Sustainable Chem. Eng.*, 2019, **7**, 15772.
- S15 F. Pang, F. Wang, L. Yang, Z. Wang, and W. Zhang, *Chem. Commun.*, 2019, **55**, 10108.
- S16 F. Pang, Z. Wang, K. Zhang, J. He, W. Zhang, C. Guo, and Y. Ding, *Nano Energy*, 2019, **58**, 834.
- S17 W. Fu, Y. Cao, Q. Feng, W. R. Smith, P. Dong, M. Ye, and J. Shen, *Nanoscale*, 2019, **11**, 1379.
- S18 H. Wang, Y. Li, C. Li, K. Deng, Z. Wang, Y. Xu, X. Li, H. Xue, and L. Wang, *J. Mater. Chem. A*, 2019, **7**, 801.
- S19 J. Bai, H. Huang, F.-M. Li, Y. Zhao, P. Chen, P.-J. Jin, S.-N. Li, H.-C. Yao, J.-H. Zeng, and Y. Chen, *J. Mater. Chem. A*, 2019, **7**, 21149.

- S20 C. Fang, T. Bi, X. Xu, N. Yu, Z. Cui, R. Jiang, and B. Geng, *Adv. Mater. Interfaces*, 2019, **6**, 1901034.
- S21 L. Yang, T. Wu, R. Zhang, H. Zhou, L. Xia, X. Shi, H. Zheng, Y. Zhang, and X. Sun, *Nanoscale*, 2019, **11**, 1555.
- S22 R. Zhang, H. Guo, L. Yang, Y. Wang, Z. Niu, H. Huang, H. Chen, L. Xia, *ChemElectroChem*, 2019, **6**, 1014.
- S23 L. Xia, B. Li, Y. Zhang, R. Zhang, L. Ji, H. Chen, G. Cui, H. Zheng, X. Sun, F. Xie, and Q. Liu, *Inorg. Chem.*, 2019, **58**, 2257.
- S24 X. Zheng, Z. Zhang, X. Li, and C. Ding, *New J. Chem.*, 2019, **43**, 7932.
- S25 H. Huang, F. Gong, Y. Wang, H. Wang, X. Wu, W. Lu, R. Zhao, H. Chen, X. Shi, A. M. Asiri, T. Li, Q. Liu, and X. Sun, *Nano Res.*, 2019, **12**, 1093.
- S26 X. Wu, L. Xia, Y. Wang, W. Lu, Q. Liu, X. Shi, and X. Sun, *Small*, 2018, **14**, 1803111.
- S27 Z. Wang, K. Zheng, S. Liu, Z. Dai, Y. Xu, X. Li, H. Wang, and L. Wang, *ACS Sustainable Chem. Eng.*, 2019, **7**, 11754.
- S28 X. Xiang, Z. Wang, X. Shi, M. Fan, and X. Sun, *ChemCatChem*, 2018, **10**, 4530.
- S29 Q. Liu, X. Zhang, B. Zhang, Y. Luo, G. Cui, F. Xie, and X. Sun, *Nanoscale*, 2018, **10**, 14386.
- S30 K. Chu, Y. Liu, Y. Li, H. Zhang, and Y. Tian, *J. Mater. Chem. A*, 2019, **7**, 4389.
- S31 X. Wang, J. Wang, Y. Li, and K. Chu, *ChemCatChem*, 2019, **11**, 4529.
- S32 K. Chu, Y. Liu, J. Wang, and H. Zhang, *ACS Appl. Energy Mater.*, 2019, **2**, 2288.
- S33 F. Wang, Y. Liu, H. Zhang, and K. Chu, *ChemCatChem*, 2019, **11**, 1441.

- S34 Y. Liu, Y. Li, D. Huang, H. Zhang, and K. Chu, *Chem. Eur. J.*, 2019, **25**, 11933.
- S35 X. Li, L. Li, X. Ren, D. Wu, Y. Zhang, H. Ma, X. Sun, B. Du, Q. Wei, and B. Li, *Ind. Eng. Chem. Res.*, 2018, **57**, 16622.
- S36 L. Huang, J. Wu, P. Han, A. M. Al-Enizi, T. M. Almutairi, L. Zhang, and G. Zheng, *Small Methods*, 2019, **3**, 1800386.
- S37 K. Chu, Y. Liu, Y. Li, J. Wang, and H. Zhang, *ACS Appl. Mater. Interfaces*, 2019, **11**, 31806.
- S38 B. Xu, L. Xia, F. Zhou, R. Zhao, H. Chen, T. Wang, Q. Zhou, Q. Liu, G. Cui, X. Xiong, F. Gong, and X. Sun, *ACS Sustainable Chem. Eng.*, 2019, **7**, 2889.
- S39 X. Zhu, Z. Liu, Q. Liu, Y. Luo, X. Shi, A. M. Asiri, Y. Wu, X. Sun, *Chem. Commun.*, 2018, **54**, 11332.
- S40 X. Li, X. Ren, X. Liu, J. Zhao, X. Sun, Y. Zhang, X. Kuang, T. Yan, Q. and Wei, D. Wu, *J. Mater. Chem. A*, 2019, **7**, 2524.
- S41 P. Li, W. Fu, P. Zhuang, Y. Cao, C. Tang, A. B. Watson, P. Dong, J.g Shen, and M. Ye, *Small*, 2019, **15**, 1902535.
- S42 X. Zhao, X. Lan, D. Yu, H. Fu, Z. Liu, and T. Mu, *Chem. Commun.*, 2018, **54**, 13010.
- S43 P. Wei, H. Xie, X. Zhu, R. Zhao, L. Ji, X. Tong, Y. Luo, G. Cui, Z. Wang, and X. Sun, *ACS Sustainable Chem. Eng.*, 2020, **8**, 29.
- S44 R. Zhang, L. Jiao, W. Yang, G. Wan, and H.-L. Jiang, *J. Mater. Chem. A*, 2019, **7**, 26371.
- S45 Y. Liu, Q. Xu, X. Fan, X. Quan, Y. Su, S. Chen, H. Yu, and Z. Cai, *J. Mater.*

- Chem. A*, 2019, **7**, 26358.
- S46 Q. Fan, C. Choi, C. Yan, Y. Liu, J. Qiu, S. Hong, Y. Jung, and Z. Sun, *Chem. Commun.*, 2019, **55**, 4246.
- S47 Y. Song, T. Wang, J. Sun, Z. Wang, Y. Luo, . Zhang, H. Ye, and X. Sun, *ACS Sustainable Chem. Eng.*, 2019, **7**, 14368.
- S48 J. M. Soler, E. Artacho, J. D. Gale, A. Garcia, J. Junquera, P. Ordejon and D. Sanchez-Portal, *J. Phys.: Condens. Matter*, 2002, **14**, 2745.
- S49 J. Junquera, O. Paz, D. Sanchez-Portal and E. Artacho, *Phys. Rev. B: Condens. Matter*, 2001, **64**, 235111.
- S50 N. Troullier and J. L. Martins, *Phys. Rev. B: Condens. Matter*, 1991, **43**, 993.
- S51 J. P. Perdew, K. Burke and M. Ernzerhof, *Phys. Rev. Lett.*, 1996, **77**, 386.
- S52 J. K. Nørskov, J. Rossmeisl, A. Logadottir, L. Lindqvist, J. R. Kitchin, T. Bligaard, and H. Jonsson, *J. Phys. Chem. B*, 2004, **108**, 17886.
- S53 A. A. Gokhale, S. Kandoi, J. P. Greeley, M. Mavrikakis, and J. A. Dumesic, *Chem. Eng. Sci.*, 2004, **59**, 4679.
